# Supplementary material
Source: PubMed Central journal article supplement (PMC5388352)

Figure S2

A

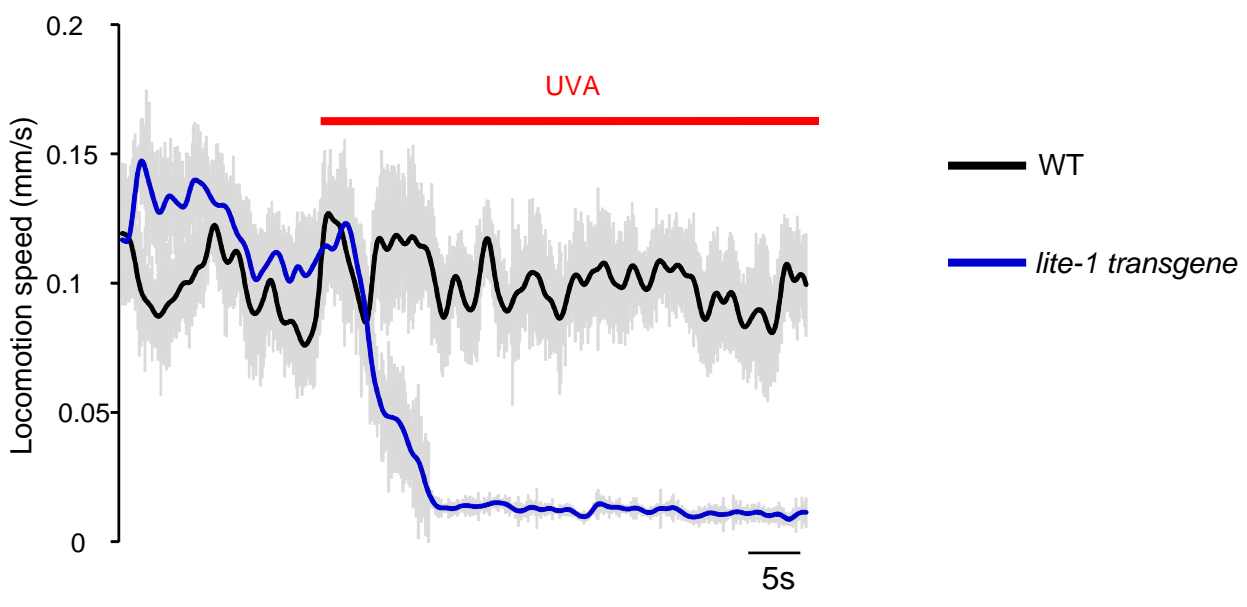

Supplement: NIHMS827499-supplement-2.pdf [file NIHMS827499-supplement-2.pdf]

**Figure S3****A**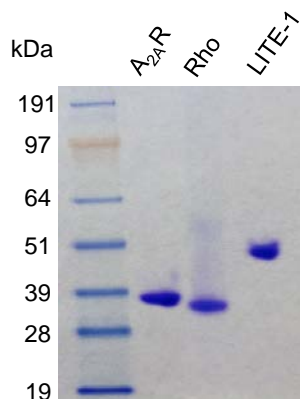**B**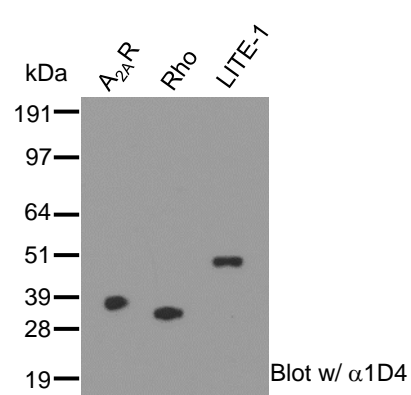**C**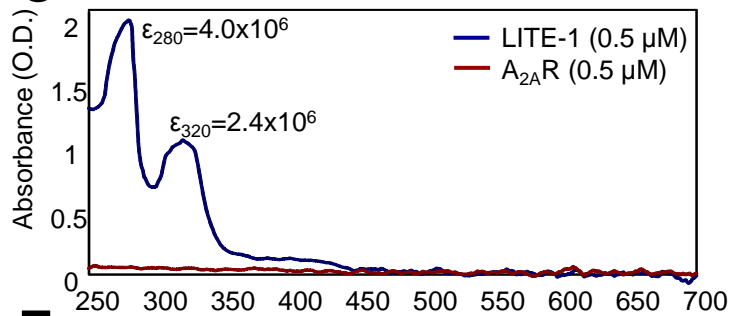**D**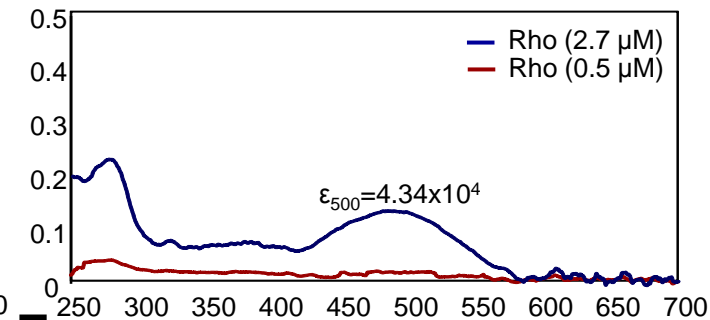**E**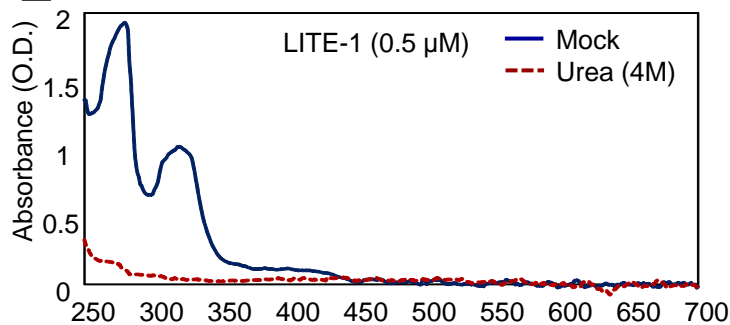**F**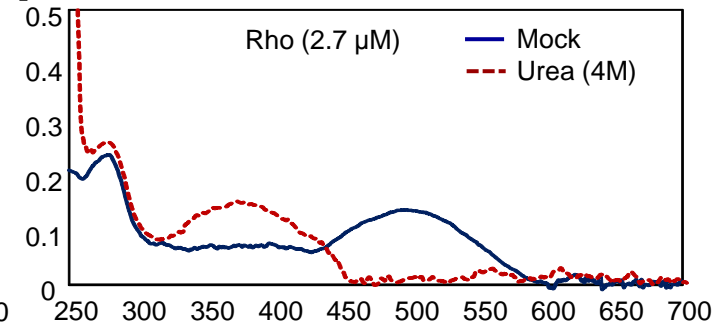**G**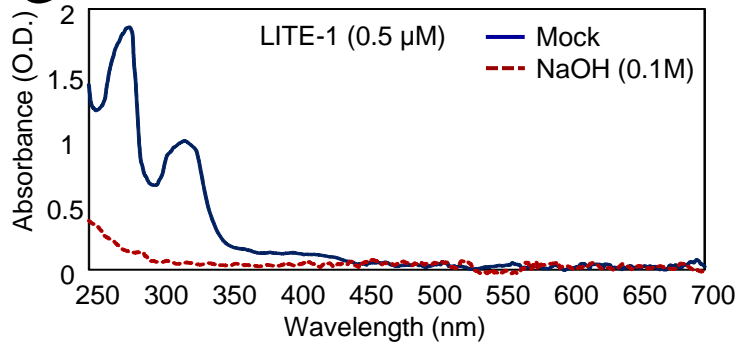**H**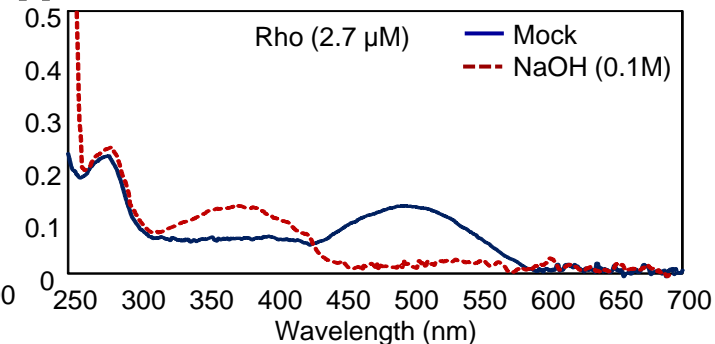

Supplement: NIHMS827499-supplement-3.pdf [file NIHMS827499-supplement-3.pdf]
